# Supplementary material for: Genome-wide identification of MAPK family genes and their response to abiotic stresses in tea plant (Camellia sinensis)
Source: PubMed Central journal article supplement (PMC9462544; doi:10.1515/biol-2022-0466), 2022-09-08
Supplement: biol-2022-0466-sm.pdf [file biol-2022-0466-sm.pdf]

# Supplementary Materials

```

CsMPK3-3 : -----*-----20-----*-----40-----*-----60-----*-----80-----*-----IAG : 15
CsMPK3-4 : -----*-----20-----*-----40-----*-----60-----*-----80-----*-----CSPLVTC : 24
CsMPK3-5 : --MLWSMGSASPNTGCDPVYVUSTPLQCGPTTPNSRDNGIAGWHTLIQHQQWPFSESRRLN-GPIPAATQSTQSPRRCKDRRTGTCTGTMTG : 90
CsMPK3-2 : -----*-----20-----*-----40-----*-----60-----*-----80-----*-----DADNYTDKOTLREIKLKR--HLSHEN : 81
CsMPK3-1 : -----*-----20-----*-----40-----*-----60-----*-----80-----*-----MADSMHNIFC-NLFEITAKYRSPIMP : 81
CsMPK6 : QPYDTVMSEAAYNIFC-NLFEITAKYRSPIMPGRGAYGIUCS-ALDSENEHQAIRKIA-N-ADNMKIDAKRTLREIKLRHMDHENVITVA : 89
CsMPK4-4 : -----*-----20-----*-----40-----*-----60-----*-----80-----*-----LFEIRFDIMLTYCC-ATLSEKKEB : 71
CsMPK4-2 : -----*-----20-----*-----40-----*-----60-----*-----80-----*-----HTPFFFS--FENFSA-AV : 58
CsMPK4-1 : -----*-----20-----*-----40-----*-----60-----*-----80-----*-----MTAKVLSGRKRNAITCGNATPATNEL : 92
CsMPK4-3 : -----*-----20-----*-----40-----*-----60-----*-----80-----*-----MSEGNIAC---FEVSRKYIPP--- : 75
CsMPK7 : --MATLVEPPNYYSMWQILFEIDTKYVP- : 85
CsMPK1-2 : RQMATQVEPPNYYSMWQILFEIDTKYVP- : 87
CsMPK1-1 : --MATPVEPPNYYSMWQILFEIDTKYVP- : 85
CsMPK20 : LKGRILVECHRSTEMDFSEYCDANRYKIQEV : 88
CsMPK19-1 : -----*-----20-----*-----40-----*-----60-----*-----80-----*-----MDFFTEYGD : 74
CsMPK19-2 : -----*-----20-----*-----40-----*-----60-----*-----80-----*-----PKEMDFTEYGD : 77
CsMPK16-2 : -----*-----20-----*-----40-----*-----60-----*-----80-----*-----MQPDQRSVDVDFTEYGC : 83
CsMPK16-1 : -----*-----20-----*-----40-----*-----60-----*-----80-----*-----PTPCGVKSDQRAADVFTEYGC : 88
CsMPK9-1 : -----*-----20-----*-----40-----*-----60-----*-----80-----*-----MLDKKFFTEYGCASRYQ : 77
CsMPK15 : CVRRWFQRRPSTLDTFFTEYGCASRYQ : 88
CsMPK9-2 : -----*-----20-----*-----40-----*-----60-----*-----80-----*-----TVIDYFLTS-STLDTFFTEYGC : 87

```

f da r lre ll

```

CsMPK3-3 : IRDVVPPFLQRELSQVYVATELMDTDLHQIIPSKQSLSEEEHCQ-YFLVQI-LRCLKYIHSANVPHRDLKPSNLLANANCDLKI : 105
CsMPK3-4 : IRDVVPPFLQRELSQVYVATELMDTDLHQIIPSKQSLSEEEHCQ-YFLVQI-LRCLKYIHSANVPHRDLKPSNLLANANCDLKI : 115
CsMPK3-5 : IRDVVPPFLQRELSQVYVATELMDTDLHQIIPSKQSLSEEEHCQ-YFLVQI-LRCLKYIHSANVPHRDLKPSNLLANANCDLKI : 181
CsMPK3-2 : IRDVVPPFLQRELSQVYVATELMDTDLHQIIPSKQSLSEEEHCQ-YFLVQI-LRCLKYIHSANVPHRDLKPSNLLANANCDLKI : 172
CsMPK3-1 : IRDVVPPFLQRELSQVYVATELMDTDLHQIIPSKQSLSEEEHCQ-YFLVQI-LRCLKYIHSANVPHRDLKPSNLLANANCDLKI : 172
CsMPK6 : IRDIIIPPLQRELSQVYVATELMDTDLHQIIPSKQSLSEEEHCQ-YFLVQI-LRCLKYIHSANVPHRDLKPSNLLANANCDLKI : 180
CsMPK4-4 : IKDIIIRPPEQRELSQVYVATELMDTDLHQIIPSKQSLSEEEHCQ-YFLVQI-LRCLKYIHSANVPHRDLKPSNLLANANCDLKI : 162
CsMPK4-2 : IKDIIIRPPEQRELSQVYVATELMDTDLHQIIPSKQSLSEEEHCQ-YFLVQI-LRCLKYIHSANVPHRDLKPSNLLANANCDLKI : 149
CsMPK4-1 : IKDIIIRPPEQRELSQVYVATELMDTDLHQIIPSKQSLSEEEHCQ-YFLVQI-LRCLKYIHSANVPHRDLKPSNLLANANCDLKI : 184
CsMPK4-3 : IKDIIIRPPEQRELSQVYVATELMDTDLHQIIPSKQSLSEEEHCQ-YFLVQI-LRCLKYIHSANVPHRDLKPSNLLANANCDLKI : 166
CsMPK7 : LKDVMMSPQMSRELSQVYVATELMDTDLHQIIPSKQSLSEEEHCQ-YFLVQI-LRCLKYIHSANVPHRDLKPSNLLANANCDLKI : 176
CsMPK1-2 : LKDVMMSPQMSRELSQVYVATELMDTDLHQIIPSKQSLSEEEHCQ-YFLVQI-LRCLKYIHSANVPHRDLKPSNLLANANCDLKI : 178
CsMPK1-1 : LKDVMMSPQMSRELSQVYVATELMDTDLHQIIPSKQSLSEEEHCQ-YFLVQI-LRCLKYIHSANVPHRDLKPSNLLANANCDLKI : 177
CsMPK20 : IKHIMLPPSRELSQVYVATELMDTDLHQIIPSKQSLSEEEHCQ-YFLVQI-LRCLKYIHSANVPHRDLKPSNLLANANCDLKI : 179
CsMPK19-1 : IKHIMLPPSRELSQVYVATELMDTDLHQIIPSKQSLSEEEHCQ-YFLVQI-LRCLKYIHSANVPHRDLKPSNLLANANCDLKI : 165
CsMPK19-2 : IKHIMLPPSRELSQVYVATELMDTDLHQIIPSKQSLSEEEHCQ-YFLVQI-LRCLKYIHSANVPHRDLKPSNLLANANCDLKI : 168
CsMPK16-2 : IKHIMLPPSRELSQVYVATELMDTDLHQIIPSKQSLSEEEHCQ-YFLVQI-LRCLKYIHSANVPHRDLKPSNLLANANCDLKI : 174
CsMPK16-1 : IKHIMLPPSRELSQVYVATELMDTDLHQIIPSKQSLSEEEHCQ-YFLVQI-LRCLKYIHSANVPHRDLKPSNLLANANCDLKI : 172
CsMPK9-1 : IKHIMLPPSRELSQVYVATELMDTDLHQIIPSKQSLSEEEHCQ-YFLVQI-LRCLKYIHSANVPHRDLKPSNLLANANCDLKI : 168
CsMPK15 : IKHIMLPPSRELSQVYVATELMDTDLHQIIPSKQSLSEEEHCQ-YFLVQI-LRCLKYIHSANVPHRDLKPSNLLANANCDLKI : 179
CsMPK9-2 : IKHIMLPPSRELSQVYVATELMDTDLHQIIPSKQSLSEEEHCQ-YFLVQI-LRCLKYIHSANVPHRDLKPSNLLANANCDLKI : 178

```

64 66 Pp f D6Y EL6 3DLh 6I L H 5f6 Q LR h AN6 HRDLKP N61 NAIC LKIcDFCLAR

```

CsMPK3-3 : ET---*---QSETEYVTRWRYRAPEL : 192
CsMPK3-4 : ET---*---QSETEYVTRWRYRAPEL : 202
CsMPK3-5 : ET---*---QSETEYVTRWRYRAPEL : 254
CsMPK3-2 : ET---*---QSETEYVTRWRYRAPEL : 259
CsMPK3-1 : EN---*---ECSETEYVTRWRYRAPEL : 259
CsMPK6 : ET---*---DSETEYVTRWRYRAPEL : 266
CsMPK4-4 : ET---*---DSETEYVTRWRYRAPEL : 249
CsMPK4-2 : ET---*---DSETEYVTRWRYRAPEL : 236
CsMPK4-1 : ET---*---DSETEYVTRWRYRAPEL : 271
CsMPK4-3 : ET---*---DSETEYVTRWRYRAPEL : 253
CsMPK7 : DNG---*---QSETEYVTRWRYRAPEL : 264
CsMPK1-2 : GKD---*---QSETEYVTRWRYRAPEL : 266
CsMPK1-1 : GRC---*---QSETEYVTRWRYRAPEL : 265
CsMPK20 : SDTPTTIFGDDYATRWRAP : 221
CsMPK19-1 : NDPTTIFGDDYATRWRAP : 257
CsMPK19-2 : KDPTTIFGDDYATRWRAP : 260
CsMPK16-2 : NDPTTIFGDDYATRWRAP : 266
CsMPK16-1 : NDPTTIFGDDYATRWRAP : 264
CsMPK9-1 : SDAPSTIFGDDYATRWRAP : 261
CsMPK15 : NEAPSALIFGDDYATRWRAP : 271
CsMPK9-2 : NDAPSALIFGDDYATRWRAP : 270

```

f I YV TRWRYRAPEL t a d w s g c f e p g q g a 5





Motif 1

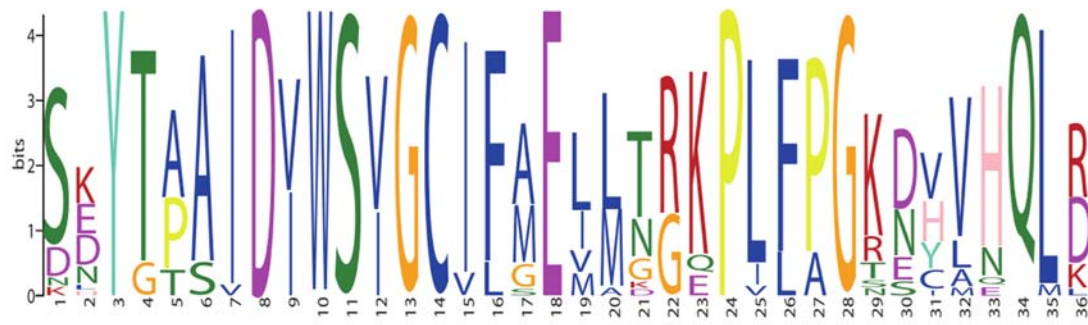

Motif 2

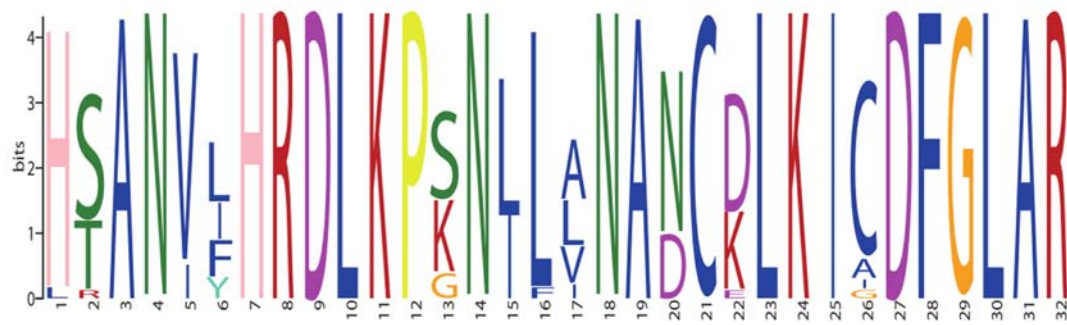

Motif 3

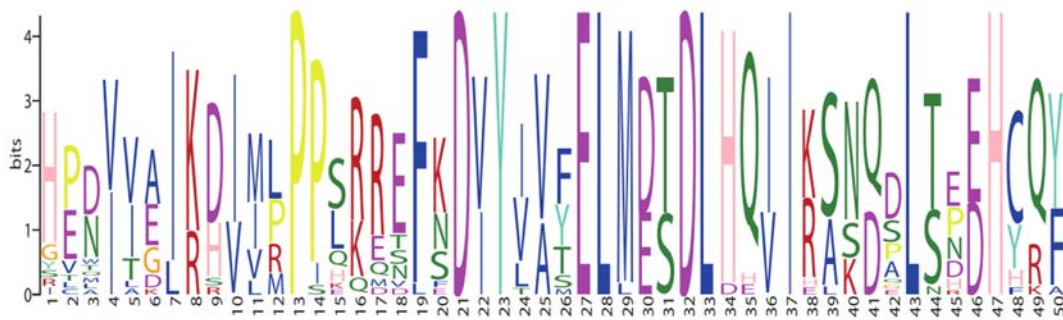

Motif 4

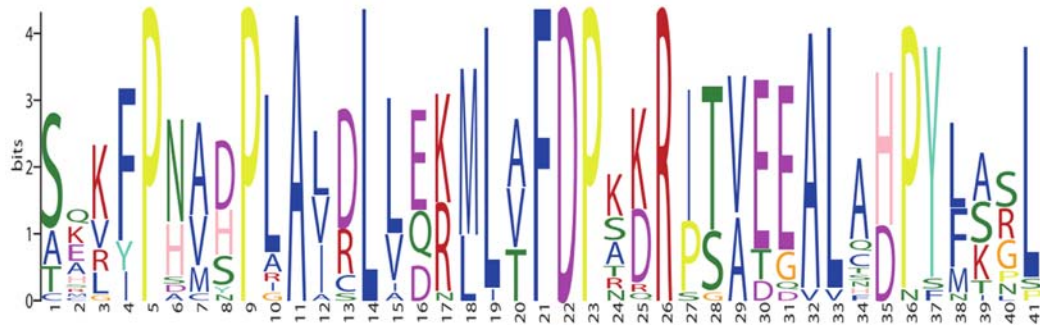



Motif 9

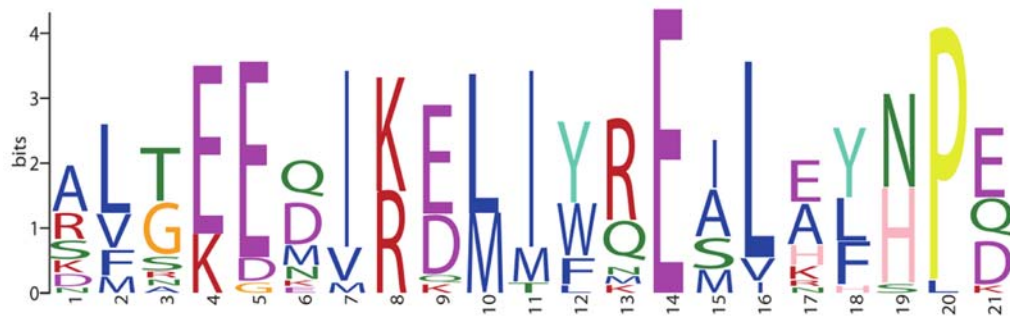

Motif 10

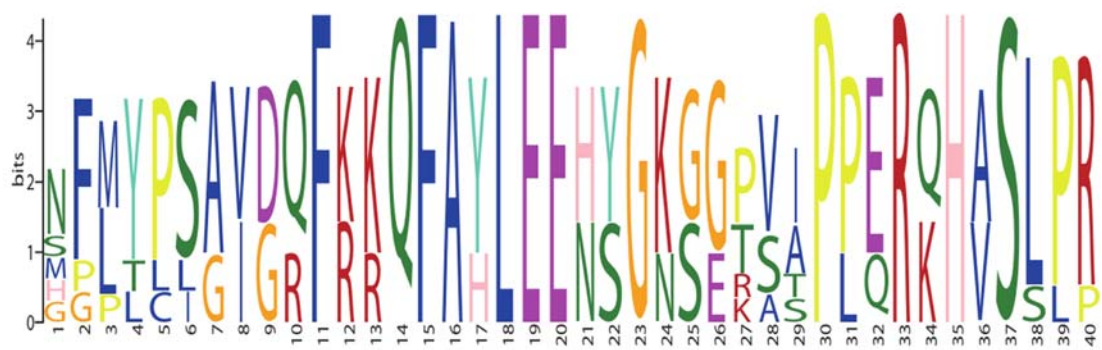

Motif 11

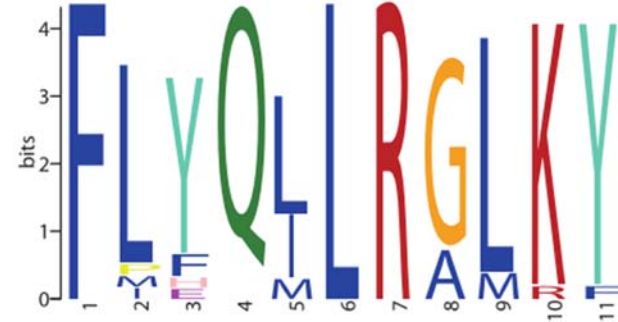**Figure S2:** The sequence information of 11 conserved motifs of CsMPKs in tea plant detected by the online tool MEME. (Color figure online).

**Table S1:** The protein sequences of CsMPKs in tea plant

---

>CsMPK3-3

MAYKSNYQHRLTIAGIRDVPPPLQRELSDVYIATELMDTDLHQIIRSKQSLSEEHCQYL  
 YQILRGLKYIHSANVIHRDLKPSNLLVNANCDLKICDFGLARPTSETQFMTEYVTRWYR  
 APELLLNSSDYTAIDVWVSGCIFMELMNRKPLLAGKDHVHQLRLLIELLGRTRTESDIGF  
 IRSIDARSYICQLPQHPRQLAKVFPVHPLAVDLVDKMLTFDPAKRITVEEALAHPYLA  
 RLHDAADEPVCLEPFSDFEQALGEEQIKDMIYQEALALNPEYA

>CsMPK3-4

MRRIGSVRSVLADRYIRCSPLVTGIRDVPPPLKREFSDVYIATELMDTDLHQIIRSKQS  
 LSEEHCQYFLYQILRGLKYIHSANVIHRDLKPSNLLVNANCDLKICDFGLARPTSETQFM  
 TEYVTRWYRAPELLLNSSDYTAIDVWVSGCIFMELMNRKPLLAGKDHVHQLRLLIELL  
 GTPTESDIGFIRSKDARSYICQLPQHPRQLAKVFPVHPLAVDLVDKMLTFDPAKRITV  
 EEALAHPYLARLHDAADEPVCLEPFSDFEQALGEEQIKDMIYQEALALNPDSVTLASQG  
 WYNNLIVFLIGQFNKVINATQIFNVINGCVTMFPILGAIVADSFLGFFVIWISSLISV  
 LGIILLISATLDSLPPPCGNGSNLCITPSKQFAVLYLGITLATIGAAGTRFTLGAMG  
 ADQFDNPKHQGSYFNWIFITLYMASIISSTAIYVEDSVSFGGLGFLCAAANVIGLVIFV  
 LGKRFYRHVKPQGSPTSLARVFVAIRKRKILLSQRSEDYNNKIHDGVTMMAVTPTKT  
 FNFLNRAALKTEGDIRADGSIAKLWNLCTVQQVEDLKALIKIAPLWSSGIFLSTPLAIQY  
 SLATLQALTMDRHLGPHFKIPPGSMAVFIMIATCITIVLLDRFLYAAWQKLSRFPTPLQ  
 RVGVGHVLCVLSMALSAIVESKRLKIARSHNLQDQSVLIVPMSAFWLVPQLALAGIGEAF  
 HFPGNTALFYQEFPMCLKSTAMVAMFVGIAYVSTALVSGVQRTTGWLPNNINHGRMD  
 NMYWLLFVIGVVNFGYFVCAWLYKYQGVAKVVDENPSSDDK

>CsMPK3-5

MLWSMGSASTGPGTGTGMVLVRTAIERRPNTGGDPVYPVSTPLQGPTPLNSRDNGIAGW  
 SALFVGKHTLIQHSQWFLSERRLNGDPIPAATQSTQSPRRCKDRRTGTGTMTGIRDV  
 VPPPLQREFSDVYIATELMDTDLHQIIRSKQSLSEEHCQYFLYQILRGLKYIHSANVIHR  
 DLKPSNLLVNANCDLKICDFGLARPTSETQFMTEYVTRWYRAPELLLNSSDYTAIDVW  
 SVGCIFMELMNRKPLLAGKDHVHQLRLLIEQRCKKLYLSTTPTSSAAVSKGFPACHPLAV  
 DLVDKMLTFDPAKRITVEEALAHPYLARSHDAADEPVCLEPFSDFEQALGEEQIKDMTY  
 QEALALNLEYA

>CsMPK3-2

MTDVNSAGGELVHGGQFIRHNVSGLFEITAKYRPPIMPLGRGAYGIVCSMLNSETNEMI  
 AMKKISDAFDNYDAKRTLREIKLLRHLHENVTGIRDIVPPPLKREFFDVYIATELMDT  
 DLHQIIRSKQSLSEEHCQYFLYQILRGLKYIHSANVIHRDLKPSNLLVNANCDLKICDFG  
 LARPTSETQFMTEYVTRWYRAPELLLNSSDYTAIDVWVSGCIFMELMNRKPLLAGKDH  
 VHQLRLLIELLGRTPTESDIGFIRSKDARSYICQLPQHPRQLAKVFPVHPLAVDLVDKM  
 LTFDPAKRITVEEALAHPYLARLHDAADEPVCLEPFSDFEQALGEEQIKDMIYQEALAL  
 NPEYA

>CsMPK3-1

MADSNTVAGQFPEFPAIPTHGGQFIQHNIFGNLFEITAKYRSPIMPIGRGAYGIVCSVMN  
 SETNEMVAIKKIANAFDNFMDAKRTLREIKLLRHLHENVIAIRDVIPPPLRQEFSDVYI  
 AMELMDTDLHQIIRSNQGLSEEHCQYFLYQILRGLKYIHSANVIHRDLKPSNLLVNANCD  
 LKIIDFGLARPTSENEGMEYVTRWYRAPELLNLSSEYTAIDVWVSGCIFMELMNRKP

---

(Continued)

Table S1: Continued

---

LFPGNDHMHQMRLLIELLGTPTESDLEFIRSEDARRYLRQFPQHPRQQLAMVFPVHNPLA  
 IDLIENMLTFDPSKRITVEQALAHPYLARLHDIADPEVCTESFSDFEQAMGEEQIKDMI  
 YQEAIALNPEFA

>CsMPK6

MDASAPYDTVMSEAAPPPQSDPPPQPPPAAGIEHIPATLSHGGRFIQYNIQNFIFEVT  
 AKYKPPIMPIGKGAYGIVCSALNSETNEHVAIKKIANAFDNKIDAKRTLREIKLLRHMDH  
 ENVINFGSSFPKMTLNVNSFTQCCERRSEVQAVRLKGPKARLQPHSITTYIIQPNLNQST  
 QIPNLSKKSVSLSPLGSSLSISTSISIEVSSPPPPPPPLLLCWSLVAGCWVVAIRDIIIP  
 PPQRESFNDVYIAYELMDTDLHQIIRSNQALSEEHCQYFLYQILRGLKYIHSANVLRDL  
 KPSNLLLNNANCDLKICDFGLARVTSETDFMTEYVVTRWYRAPELLLNSSDYTAIDVWSV  
 GCIFMELMDRKLFPGRDHAHQRLMLMELIGTPSEAEFGFLNENAKRYIRQLPPFHRQSL  
 TEKFPVHHPAAIDLVEKMLTFDPRQRITVEGALAHPYLTSLHDISDEPICLTPFSDFEN  
 HALSEEQMKELIYREALAFNPEYQIM

>CsMPK4-4

MTLFSLPSFKCLFEMRFDIMLTCCATNSETKEEVAIKRIANAFDNRIDAKRTLREIKLL  
 CHMDHENTTIVQVIKIDIRPPEKDEFNDVYIAYELMDTDLHQIHSSELTDHDCQYF  
 LYQLLRGLKYIHSANVLRDLKPSNLLLNNANCDLKICDFGLARTTSETDFMTEYVVTRWY  
 RAPELLNCSEYTAADIWSVGCILMEILKREPLFPGKDYVQQLLITELGSPPEESDLG  
 FLRSENARKYVKQLPCVPKPFSHKFPDASPIAIDLAERMLVDFPSKRITVEEALNHPFL  
 SGLHEINEEPTCPSPFIDFEQSSLEEDIKELIWRESLNFSPDEFFNVLTCWEAVVVG  
 IILGLCFILSSRVCMMNLYAKKKKSDLKIQGAKKKAMRFSQIFVKASSSSSHSRNRSAS  
 ASSLLLSTASRSFSLRSPSQRPSFGIAFDIDGVILRGNTPIGGSPQALGRLYHDSFGTL  
 KVPYVFLTNGEPFVSSCYTRPYTFQTAGKERSYFMGTKEVLLVDVAVVRFENDLIIAVG  
 KGEPATVMSEYGFKNASIDEYASCFDNIDPLAQFKKWTGHVNQNNITRSTACTQRVHA  
 AFIVSDSVDWSRDIQVLCILRTGGFPGREIAHQPSLYFANDDLEYQAVFSPERLGMGAF  
 RIALESIFNSIHPNALEYTSFGKPNPSVFRNAETVLMETVPSSYQSANHVTTGGNHVFRTL  
 YMIGDNPSVDIKGAKQAGHPWFSILTRTGVFKGKKNHAEHPADLVGELTLYICSNFSFKF  
 HFSLETIILLSTFASQT

>CsMPK4-2

MTPFFFSNFSAAVNSETHEEIAIKKIGNAFDNQIDAKRTLREIKLLCHMDHENILAIK  
 DIIRPPKKQVFNDDVYIVSELMDTDLHQIIRSNQPLTDHDCQYFMYQLLRGLKYVHSANV  
 HRDLKPSNLFNANCDLKIADFLARTTSETDFMTEYVVTRWYRAPELLNCSEYTAAD  
 VWSVGCILGEIATREPLFGRDYAEQLRLITELGSPNDTCLGFLRSDNARRYVKQLPRY  
 PKQQFSARFPNMSPLAIDLLEKMLVFDPTKRITVDEALCHPYLSSLHDINDEPICPSPFS  
 FDFEQPAFNEEKIKDLIWMESLKFNPDPH

>CsMPK4-1

MMLHIRRQMKMEMKVVEGGKSAEEDDEDDVAKSVEGSINGNHTVEGLSDDVDGGQSLERQ  
 QQPYPLADDALGELKVAYEALKEHNISSEANIEVIIYEFIKQHVCIDIEAKKGELLGL  
 YEAVRQHSTILGAENSELVKGLGDYQPRISVLDRLQDEMHSSEDEMASSISNQVEVLHKE  
 VAERASILEQEWNSTVAQVQVTEKLDALIRSLFSTASVDAATKVIDNLQEKLEASGKDH  
 TAMCSSYKDMIEKFNDLHRKNELAIQVHGVHGNLQRLVNDSCQHVEQSQIINQENLID

---

(Continued)



Table S1: *Continued*

PLHLDNYDTLMEQLAVLLGERLQFKSMNDKLNLELIDMAKEMEKLKKTGLDSDTILKLVE  
 DVEGAVKNGTGDISEKLESRLQLRISFLSDSLEILTRDYDEVSEKAVQFELQNDKLQKE  
 VSALQEKLVEKEHPSDSLEILTRDYDEVSEKAVHFELKNDKLQKEVSALQEKLVEKEHPS  
 DSLEILTRDYDEVSEKAVQFELQNDKLQKEVSALQEKLVEKEHPSDSLEILTRDYDEVSE  
 KAVQFELQNDKLQKEVSALQEKLVEKEHPSDSLEILTRDYDEVSEKAVQFELQNDKLQKE  
 VSALQEKLVEKEHPSDSLEILTRDYDEVSEKAVQFELQNDKLQKEVSALQEKLVEKEHPS  
 DSLEILTRDYDEVSEKAVQFELQNDKLQKEVSALQEKLVEKEHPSDSLEILTRDFDKVSE  
 KVVQFELENDKLEEVSALEKLVEKVRNQEHEGIEIRRELDLVHDLKDSVTEDVVSAG  
 SSTKCLEQLLKKLSEKYTALALEKPILVDSADEKNTKTRPRPMTAKVLSGRKRSTRVRG  
 RTLKGGVQKRIARKKGEKLVVYVNRVLNAITGGNATPATNELGLQIRRLCPLQSVKSWTK  
 INESTKDAVIQADKFVIGDDFDNDEQAQQILDRKAYLLYKDWRYNLKQEFLEEEKGVDD  
 PYSHPSPGVSLDDWRYLIDVAWKDESHLKEEGCTFKPEWAVAYEALKEHNISSEANIE  
 VIILYEFIKQHVCDIEAKKGELLGLYEAVRQHSTILGAENSELVKKGDYQPRISVLDRQ  
 LDEMHSSEDEMASSISNQVEVLHKEVAERASILEQEWNSTVGVVQTVKLDALIRSFLL  
 AWTYVAVIAIKDIIRPPLKENFNDVYVYELLDLHLHQIIRSNQPLNDDHCRALYTASGN  
 ELFVKGYVSFFIHQGDVRNLTSMQSVCVNMTSVRADCIVHLIDSSILLMQYFLYQILRG  
 LKYVHSANVLRDLKPSNLLLNCANCDLKIGDFGLARTTSETDFMTEYVTRWYRAPELLL  
 NCSEYTAIDIWSVGCILGEIMTRQPLFPQKDYVHQLRLITELIGSPDDASLGFLRSDNA  
 RRYVRQLPQYPRQFSARFPNMSPGAADLLEKMLVFDPNKRITVEGALCHPYLAPLHDIN  
 EEPVCPRPFSDFEQPSFTEENIKELIWRESVRFNPDPPIH

>CsMPK4-3

MSEGNIAIGIPHTGGRYVQYNVYGTLEFVSRKYIPPIRPVGRGAYGIVCAAVNSEETREEVA  
 IKKIGNAFDNRIDAKRTLREIKLLLHMDHENVIAIKDIIRPPQKENFNDVYTVSELMDTD  
 LHQIIRSNQQLSNDHCRYFLYQLLRGLKYVHSANVLRDLKPSNLLLNCANCDLKIADFL  
 ARTTSETDFMTEYVTRWYRAPELLLNCSEYTAIDIWSVGCVFGEIMTRQPLFPGRDYV  
 HQLRLITELIGSPDDASLGFLRSDNARRYVRQLPQYSRQFSARFPNMSPAADVLEKML  
 VFDPNRRITVDGALSHPYLAPLHDINEEPVCPRPFNDFEQPSFTEENIKELIWRESVKF  
 NPDPIH

>CsMPK7

MATLVEPPNGVVKPLGKHYYSMWQILFEIDTKYVPIKPIGRGAYGVVCSINRETNEKVAI  
 KKINNVFGNRIDALRTLRELRLLRHIRHENVIALKDVMMPSQRMSFEDVYLVYELMDTDL  
 HHIKSSQPLSNDHCKYFIQLLRGLRGLYLSANILHRDLKPGNLLVNANCELKICDFGLA  
 RTSRDNGQFMTEYVTRWYRAPELLLCCDNYGTSIDVWSIGCIFAELGRKPIFPGSECL  
 NQLKLIINVLGSQCEADLEFIDGQKARRFIKSLPYARGVQLSSLYPHADPLAVDLLQRML  
 VFDPKRVITVEALHHPYMSSLYDPSRNPQAQVEINLDIDENMGEGMIRQLMLREMLHYH  
 PEACANT

>CsMPK1-2

MLKDLKNVIARQMATQVEPPNGIKSVGKHYSMWQTLFEIDTKYVPIKPIGRGAYGIVCS  
 SINRETNEKVAIKIHNVDNRIDALRTLRELKLLRHLRHENVIALKDVMMPIHRRTFKD  
 VYLVYELMDTDLHLQIKSSQALTDHQCQYFLFQLLRGLKYLHSANILHRDLKPGNLLINA  
 NCDLKICDFGLARTSSGKQFMTEYVTRWYRAPELLLCCDNYGTSIDVWSVGCIFAELL

(Continued)



Table S1: Continued

---

GRKPVFPGTECLNQLKLIINILGSQREDDIEFIDNPKARKYIKSLPCSPGTPFSCLYPNA  
HPLAIDLLQKMLVFDPTKRIGVTEALQHPYMSSLYDQSSDPPAQVPIDLIDEDLREEMI  
REMMWNEMLHHHPEAAPANMEVNQ  
>CsMPK1-1  
MATPVEPPNGINS PGKHYYSMWQTLFEIDTKYVPIKPIGRGAYGIVCSSINRETNEKVAI  
KKIHNAFENCVDALRTLRELKLLRHLRHENVIALKDVMMPHRRFTKDVYLVYELMDTDL  
HQIHKSSQALTNDHCQYFLFQEDSVVLLKVMKDSVNGQTFGLDLCDRDSGALGQNMEVTT  
IGKSNGNFPEQLLRGLKYLHSANILHRDLKPGNLLINANCDLKICDFGLARTSSGRGQFM  
TEYVVTRWYRAPELLCCDNYGTSIDVWVSGCIFAELLGRKPIFPGTECLNQLKLIINIL  
GSQREDDLEFIDNPKARKFIKSLPSPGTPFSLRYPNAYPLAIDLLQKMLVFDPSKRISV  
TEALQHPYMSSLYDSNCDPPAQVPIDLIDEDLGEEMIREMMWKEMLHYHPEAATANVDV  
S  
>CsMPK20  
MIVGGGEVLKGRILVECMRDLIRFPCFVKNSKRVRWDCSFVIRSRLNKQTMQQDHGKKN  
STEMDFSEYGDANRYKIQEVIGKGSYGVVCSAIDTHTGVKVAIKIHDIFEHISDAARI  
LREIKLLRLLRHPDIVEIKHIMLPPSRREFKDIYVVFELMESDLHQVIKANDDLTREHYQ  
FFLYQLLRALKYIHTANVYHRDLKPKNILANANCKLKICDFGLARVAFSDTPTTIFWTDY  
VATRWRAPELCGSFFSKTGVISSFSWAFGMSLLILLHHLHFPKN  
>CsMPK19-1  
MDFTEYGD SNRYKILEIIGKGSYGVVCSAIDTHTGEKVAIKKINDIFEHISDAIRILRE  
VKLLRLLRHPDIVDIKRIMLPPSRREFKDIYVVFELMESDLHQVIKANDDLTHDHRFFL  
YQMLRAMKYMHTANVYHRDLKPKNILANANCKLKICDFGLARVAFNDTPTTIFWTDYVAT  
RWYRAPEL CGSFFSKYTPAIDIWSIGCIFAELTGKPLFPGKSVVHQDLITDLLGTPSS  
DTISGVRNEKARRYLTGMRKKQPVLFSEKIPNADPLALRLLQRLAFDPKDRPTAEEALA  
DPYFKGLAKAEREPSCQPISKLEFEFERRRVTKEDIRELIFREILEYHPQLLDYLAGNE  
GPNFLYPSAIGQFRKQFAYLEENSGKSGPVIPPERKHVSLPRSTVNSSTVPPRTNQNLAS  
CGSRQVTEESCNSIRVTD AISGGNFVKPSRPPKVPAAKPGRVVGPVLPYENGRNINDVY  
DARAFLRNGVVPQGISPQYAARTNTVNHAKSSTEIDRNSAQARQLPAQCNGVTKQSPQIA  
IDINANTYYQPQVKSSQLNDQIAINAKLLQESQLGAIGAAVAVARREVGAVQLGLS  
>CsMPK19-2  
MQRDQRKSPKEMDFTEYGDANRYKILKIIGKGTGVVCAIDTHTGEKVSIIKINDIF  
ENTSDAIRVLEVKLLRLLRHPDIVDIKSIMLPPSRREFKDIYVVFELMESDLHQVIELN  
DDLTHDHRFFLYQMLRAMKYMHTANVYHRDLKPKNILANADCKLKICDFGLARVAFKDT  
PTAIFWTDYVATRWRAPELCGSFFSKYTPAIDIWSVGCFAEVLTGKPLFPGKNIVHQL  
DLITDLLGTPSSDTISVVQNEKSRRLTSMRKKQVPVSEKIPNADPLALRLLQRLAFD  
PKDRPTAEEALADPYFKGLAKVEREPSCQPISKLEFEFERRRVTEEEIRKLIFREILEYH  
PQLLYLAGNEGANFLYPSAVGQFRKQFAYLEENSGKSGPVIPPERKHVSLPRAVGQFR  
KQFAYLEENSGSGPIIPPERKHYPYPAIDIWSIGCIFAELTGKPLFPGKSVVHQDLIT  
DLLGTPSSDTISGVRNEKARRYLTGMRKKQPVLFSEKIPNADPLALRLLQRLAFDPKDR  
PTAEEALADPYFKGLAKAEREPSCQPISKLEFEFERRRVTKEDIRELIFREILEYHPQLL  
KDYLAGNEGPNFLYPSAIGQFRKQFAYLEENSGKSGPVIPPERKHVSLPRSTVNSSTVPP

---

(Continued)

Table S1: *Continued*


---

RTNQNLASCGSRQVTEESCNSIRVTDASGGNFVKPSRPPPKVPAGMVDLVKTHELKGLI  
 LKETELGPEKRKQVGRLVESIGFILGWINTVLLCRPLRNALTVSNGDLKRHEVPARADPV  
 VRVVSNPNSFSP  
 >CsMPK16-2  
 MQPDQRKKVYVSSSMPMFSSNLGPSKGYVLHGSDVDVDFTEYGEGRYRIEEVIGKGSYG  
 VVCSAYDSDLGKVAIKKINDIFEHVSDATRILREIKLLRLLRHPDIVEIKHILLPPSRR  
 EFKDIYVVFELMESDLHQVIKANDDLTPEHYQFFLYQLLRGLKYIHTANVFHRDLKPKNI  
 LANADCKLKICDFGLARVAFNDTPTAIFWTDYVATRWYRAPELCSFFSKYTPAIDIWSI  
 GCIFAELLTGKPLFPGKNVVHQDLMDTLLGIPSPESIARIRNEKARRYLSSMRKRPIP  
 FCQKFPNADPRALCLEKMLAFDPKDRPSAEALADPYFKNLARVERESSAQPVTKMEFD  
 FERRRVTKEDVRWKYLLAKLAVAFLLVFQEDSMGMTCIAVDQFKKQFAYLEEYHNGGT  
 VAPPERQHASLPRPCVLYSSDNSMQSSAEVTNDLTCCIKEVEKPHVDRISGIPKTRPLPL  
 QVPPTVGVNFFYDHRFSGAAAARPGKVVGSVLRYNCGAELEHRRMVRNPAVPTQYAVS  
 TSTRNPGSKNERREDGVEGSSVLQPKPPQYVSRKVAQAQGGSGSHWH  
 >CsMPK16-1  
 MGLLRTFLPTPGCVKSDQRASISDLVWISDDSIKFRKHGCHRRMLSDSARTLLGFAVR  
 NLSLKMEIASPTERENRRRRRGNEIIIAKNPNYKELETQFKSTSRNPNEQKWKVWIER  
 KGIGMSEVAADVEFFTEYGEGRYRIEEVIGKGSYGVVCSAYDTHLGEKVAIKKINDIFE  
 HVSDATRILREIKLLRLLRHPDIVEIKHILLPPSRRREFKDIYVVFELMESDLHQVIKAND  
 DLTPEHYQFFLYQLLRANVFHRDLKPKNILANADCKLKICDFGLARVAFNDTPTAIFWTD  
 YVATRWYRAPELCSFFSKYTPAIDIWSIGCIFESELLTGKPLFPGKNVVHQDLMDTLLG  
 TPSPEGIARIRNEKARRYLSSMRKKKPIPTQKFPNADPLALRLLERMLAFDPKDRPSAE  
 EALADPYFKNLARVEREPSAQPVTKMEFEFERRRVTKEDVRELIYREILEYHPKMLKEYL  
 EGEEPTGFMYPYSAVDQFKKQFAYLEEYHNGGTAAPPERQHASSLPRACVLYSDNSAQNS  
 TEVTNDLSKCCIKEVERPHMDRTSGIPMTRMPPQVPPSIQAGGAARPGKVVSSVLRYNNC  
 GAAAAAAETVEQRRMVRNPVPTQYAVSSSSYARRNSACKNERGGEDGVEGSNGLQPKPQ  
 YMPRVAAAQGGSGSQWLCTSLTRSDLNLRICPQKFTNPLSVFHSKPKQLNRNCFKSPFQ  
 SSISATHRLISSIYRMGDSRRPPTVPIPDVEIADKSELYRAEASLGSSFSNPLAPNPN  
 PLIIVISGPSVGKDAVIKGLREVREGIHFVVTATSRARPEGEVGDYFFVSKKEFLSM  
 VERDELLEYALVYGDYKGIKQIREFMAKGHDIVLRVDIQGAATLRRILGNSAVFIFLV  
 AESESALVKRLIGRKTETKETLLVRVATAREEVKHLRNFYVVVNAEGKLESVAVKLVESI  
 IDAEKAKVWQRTAVI  
 >CsMPK9-1  
 MLDKEFFTEYGEASQYEQEFVKGKSYGVAAAVDTHTGERRVAIKMNNVFEHVSDAIRI  
 LREIKLLRLLRHPDIVEIKHIMLPPSRRREFKDIYVVFELMESDLDEVIKANDDLTPEHFQ  
 FFLHQLLRALKYIHTANVFHRDLKPKNILANADCKLKICDFGLARVSFSDAPSTIFWTDY  
 VATRWYRAPELCSFFSKVTQSGFNLSHCIVCSNPVSCSGWLSEPHSEQPIQLEHVLN  
 LYTPAVDIWSIGCIFAEMLTGKPLFPGKNVVHQDLIITDLLGTPSSESIARIRNEKARRY  
 LNSMRKKPPVPSQKFPNADPLALSLLERLLAFDPRDRSSAEALADPYFSSLANVEDEP  
 SAQPISKLEFEFERRKLTKDDILEYHPQMLQEYLDGVDRTSFMYPRSVLCGLRFSFDPRI  
 YAVFEKVNPPAVRFAPTSLDLRIRGKKVILTGFPNHSKKGIRLLMQLILPLMLLSQR  
 ILPMECNREPEIRCEQSVGAELRAFTFYISKASHL

---

(Continued)

**Table S1:** *Continued*

---

>CsMPK15  
MGSQFVDFGRRWFQRRPSSPQPNNTQNLNNSQPLVSGFQGEDHLNVVEDFDFSGLKIIK  
VPKRINFHPTSMDPQKKTTLDTEFFTEYGEASRYQVEVVGKGSYGIVGSATDHTGERV  
AIKKINDVFDHVS DATRILREIKLLRLLRHPDIVEIKHIMLPPSRREFKDIYVVFELMES  
DLHQVIKANDDLTPEHYQFFLYQLLRGLKFIHTANVFHRDLKPKNILANADCKLKICDFG  
LARVSFNEAPSAIFWTDYVATRWRAPELCGSFFSKYTPAIDVWSIGCIFAEMLTGKPLF  
PGKNVVHQDLMTDFLGTAPESIARIRNEKARRYLSMRKKSPVPFSQKFPNADPLALR  
LLERLIAFDPKDRPSAEDALDTPYFTGLANADREPASAQPISKLEFEFERRKLTKDDVRE  
LIYREILEYHPQMLQEYLRGGDQTSFMYPGIDRFKRQFAHLEEYHGKGEKSTPLQRQHA  
SLPRERVCQGKDETISQNDLEKRTAASVATTIQSSPKESESEENANTNAQSGLNKPNYS  
ARTLLKSASISGSKCVVQAKKDSKEEPIAEHEEVDLQKLAAINS

>CsMPK9-2  
MTQTVIDYFLTSSAPCGLDCLSYSTGYTLDEFFTEYGEASRYQIQEVVGKGSYGVVG  
SAIDHTHTGERVAIKKINDVFEHVSDATRILREIKLLRLLRHPDIVEIKHIMLPPSRREFK  
DIYVVFELMESDLHQVIKANDDLTPEHYQFFLYQLLRGLKYIHTANVFHRDLKPKNILAN  
ADCKLKICDFGLARVSFNDAPSAIFWTDYVATRWRAPELCGSFFSKYTPAIDIWSIGCI  
FAEMLTGKPLFPGKNVVHQDLMTDLLGTPSPESTARIRNQKARRYLSMRKPPVPFTH  
KFPSVDPLALCLLERLLAFDPKDRPSAEVVFHNSNILPLALADPYFHGLANVDREPATQ  
PISKLEFEFERRKLAADDVRELIYREILEYHPQMHEYLCCGGDQTSFMYPRLDPLLLCA  
SAILAFVLAVHPPLLGVDRFKRQFAHLEEYHGKGERSSPLQRQHASLPRERVCVPKDEA  
TSQNNDFEVRTTASVATTLKSPSENANTDAQNGPSKPNYSARSLLKSASISASKIGAK  
GRKDSEGEIEAQNEEVDASSQKVAALCA

---

**Table S2:** The primer sequences of the CsMPK genes in tea plant for quantitative RT-PCR

| Name             | Forward primers (5'to 3') | Reverse primers (5'to 3') |
|------------------|---------------------------|---------------------------|
| <i>CsMPK4-2</i>  | TTCCAATTCAGTGCTGCTG       | TGAAGATCGGTGTCATCAA       |
| <i>CsMPK3-1</i>  | ACCCACTGAATCGGATCTTG      | GACCGGTTTCGTCAGCTATGT     |
| <i>CsMPK19-1</i> | CGAAATGAGAAGGCAAGGAG      | GTCGCCTCTCGAACTCAAAC      |
| <i>CsMPK4-1</i>  | TTCCACAATACCCACGACAA      | TCAGTGAATGATGGCTGCTC      |
| <i>CsMPK9-1</i>  | CCACAGATGCTGCAGGAGTA      | GTTCCGAAACCCAGTGAGAA      |
| <i>CsMPK6</i>    | CTTCAGCTCAGCCCTACGAC      | GAATTCAAAGCCGAGCAGAC      |
| <i>CsMPK15</i>   | ACAGTTTGCCCATCTTGAGG      | TGATTCCTCGGATTCTTTGG      |
| <i>CsMPK19-2</i> | GCAGGAATGGTTGATCTGGT      | GAGGCCGACATAAAAGGACA      |
| <i>CsMPK16-2</i> | GTGGAACTGTTGCTCCACCT      | AGCACCTGAGAAGCGATGAT      |
| <i>CsMPK7</i>    | ATCTCAACCGCTTTCCAATG      | TAGCCCGAAGTCGCATATCT      |
| <i>CsMPK3-3</i>  | CTTGCGGGTAAAGACCATGT      | GATGGACATGTGGAAAACC       |
| <i>CsMPK3-2</i>  | CTTGCGGGTAAAGACCATGT      | GATGGACATGTGGAAAACC       |
| <i>CsMPK20</i>   | GTGGAGTGCATGAGGGATCT      | TCAATGGCTGAGCAAACAAC      |
| <i>CsMPK4-3</i>  | TATACGCCCTCCACAAAAGG      | CAATTTGCATTGAGGAGCAA      |
| <i>CsMPK1-2</i>  | CCTGGGAACCTTCTCATCAA      | AAAGATGCATCCGACAGACC      |
| <i>CsMPK9-2</i>  | ATCAGCTTCTTCGTGGCCTA      | AGCACGATACCATCGGGTAG      |
| <i>CsMPK4-4</i>  | GAGTCTGCCCATGATGAAT       | AGCGAAGGTGTGAGAAGGAA      |
| <i>CsMPK16-1</i> | GTCAGCTCAGTTGCGGTA        | TTGGATCCTTCGACTCCATC      |
| <i>CsMPK1-1</i>  | CCAGAGCTCCTCTGTGTG        | CCTTGCTTTCGGGTATCAA       |
| <i>CsMPK3-4</i>  | CTTGCGGGTAAAGACCATGT      | GATGGACATGTGGAAAACC       |
| <i>CsMPK3-5</i>  | CTTGCGGGTAAAGACCATGT      | AGCTGCGTCATGTGATCTTG      |
| <i>Actin</i>     | GCCATCTTTGATTGGAATGG      | GGTGCCACAACCTTGATCTT      |



**Table S3:** The number and composition of promoter elements of each CsMPK gene

|                  | ABRE | TGACG-motif | CGTCA-motif | TCA-element | ERE | GARE-motif | P-box | LTR | MBS | MYB | MYC | ARE |
|------------------|------|-------------|-------------|-------------|-----|------------|-------|-----|-----|-----|-----|-----|
| <i>CsMPK1-1</i>  |      | 3           | 3           |             |     |            |       | 1   |     | 1   | 1   | 1   |
| <i>CsMPK1-2</i>  | 1    |             |             |             | 1   |            | 1     | 1   | 1   | 4   | 2   |     |
| <i>CsMPK3-1</i>  | 2    |             |             |             | 2   |            |       |     |     | 4   | 2   |     |
| <i>CsMPK3-2</i>  |      |             |             | 1           | 2   |            |       | 1   | 1   | 3   | 1   | 2   |
| <i>CsMPK3-3</i>  | 1    |             |             |             | 2   |            |       |     |     |     | 2   | 3   |
| <i>CsMPK3-4</i>  | 6    | 1           | 1           |             | 1   | 1          |       |     |     | 3   | 4   | 2   |
| <i>CsMPK3-5</i>  | 1    | 1           | 1           | 1           |     |            |       | 1   | 1   | 6   | 2   | 1   |
| <i>CsMPK4-1</i>  | 2    | 2           | 2           | 1           |     | 1          |       |     | 1   | 4   | 3   | 1   |
| <i>CsMPK4-2</i>  |      | 1           | 1           | 1           |     |            |       |     |     | 2   | 3   | 6   |
| <i>CsMPK4-3</i>  | 2    | 2           | 2           |             | 5   |            |       | 1   | 1   | 2   | 5   | 2   |
| <i>CsMPK4-4</i>  |      |             |             |             |     |            |       |     | 1   | 1   | 2   | 1   |
| <i>CsMPK6</i>    |      |             |             |             | 3   |            | 1     | 1   |     | 4   | 7   | 1   |
| <i>CsMPK7</i>    |      |             |             |             | 3   |            |       |     |     | 1   | 4   |     |
| <i>CsMPK9-1</i>  |      |             |             | 1           |     |            |       | 1   | 2   | 6   | 3   | 4   |
| <i>CsMPK9-2</i>  | 1    | 1           | 1           |             |     |            |       |     |     | 3   | 2   | 6   |
| <i>CsMPK15</i>   |      |             |             | 2           | 1   |            | 1     |     |     | 6   | 1   | 4   |
| <i>CsMPK16-1</i> |      | 1           | 1           |             | 2   |            |       |     |     | 4   | 5   | 1   |
| <i>CsMPK16-2</i> | 2    | 1           | 1           |             | 1   |            |       |     |     | 4   | 3   | 1   |
| <i>CsMPK19-1</i> |      |             |             | 2           |     |            | 1     |     |     | 4   | 2   | 3   |
| <i>CsMPK19-2</i> |      | 2           | 2           | 1           |     |            |       | 2   | 1   | 1   | 3   |     |
| <i>CsMPK20</i>   |      |             |             |             | 4   |            | 1     |     |     | 3   | 2   | 5   |
